# Supplementary material for: A global systematic review and meta‐analysis on the babesiosis in dogs with special reference to Babesia canis
Source: PubMed Central journal article supplement (PMC11063922; doi:10.1002/vms3.1427), 2024-05-02
Supplement: VMS3-10-e1427-s001.pdf [file VMS3-10-e1427-s001.pdf]

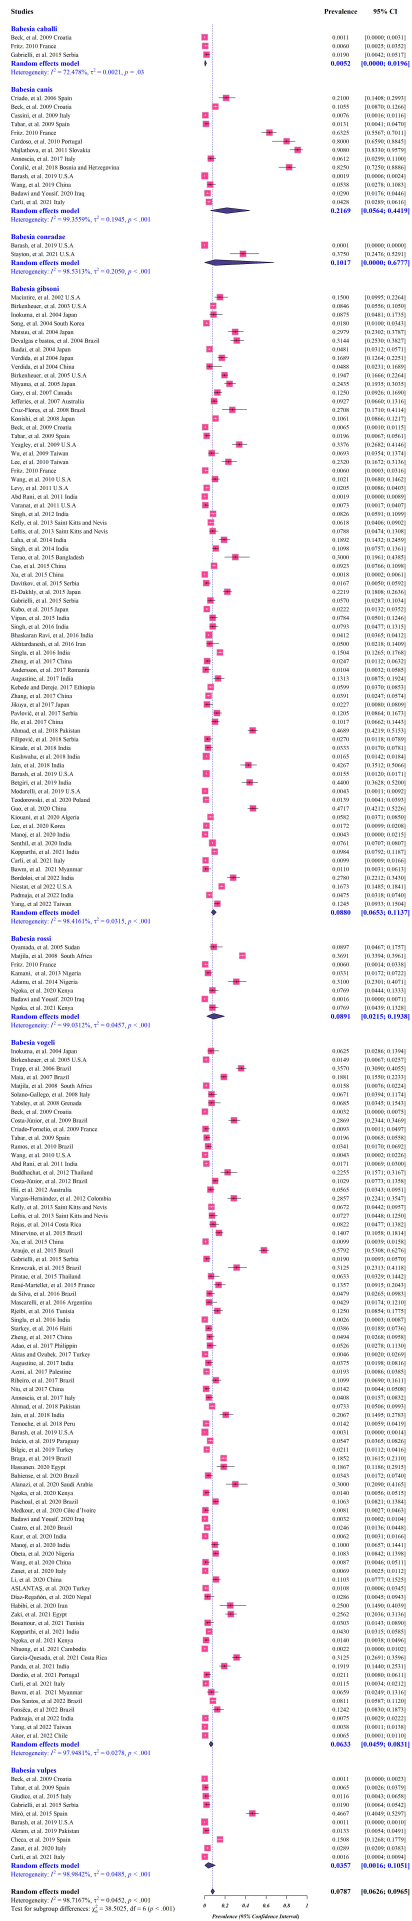

Supplementary Figure 5. Forest plots for random-effects meta-analysis of *Babesia* in dogs based on species in the included studies (The boxes indicate the effect size of the studies (prevalence) and the whiskers indicate its confidence interval for corresponding effect size. There is no specific difference between white and black bars, only studies with a very narrow confidence interval are shown in white. In the case of diamonds, their size indicates the size of the effect, and their length indicates confidence intervals).
