# Supplementary material for: A global systematic review and meta‐analysis on the babesiosis in dogs with special reference to Babesia canis
Source: PubMed Central journal article supplement (PMC11063922; doi:10.1002/vms3.1427), 2024-05-02
Supplement: VMS3-10-e1427-s004.pdf [file VMS3-10-e1427-s004.pdf]

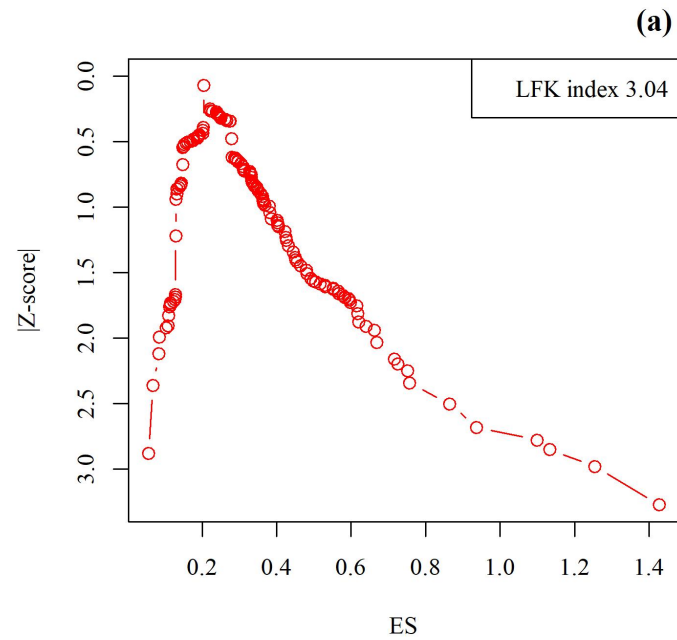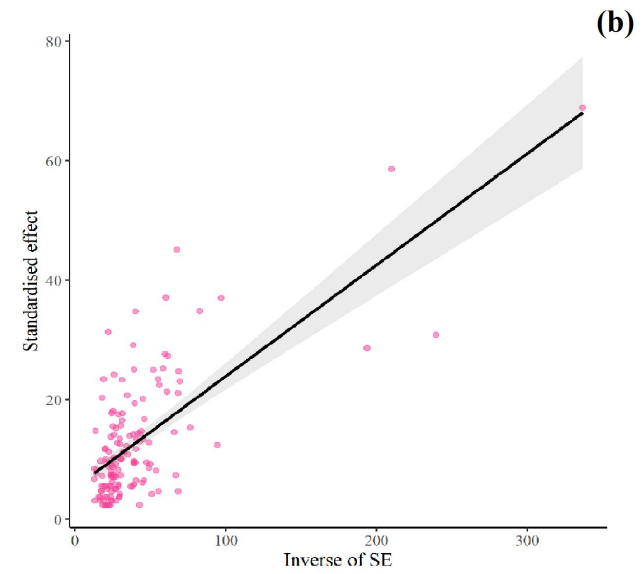

**Supplementary Figure 9.** (a) Doi plot of global prevalence of *Babesia* in dogs, A Luis Furuya -Kanamori (LFK) index 3.04 indicates major asymmetry, and (b) linear regression plot to assess publication bias in studies evaluating *Babesia* in dogs (Colored circles represent each study)
